# Supplementary material for: Evaluating the nonlinear effects of sleep duration on biological aging across phenotypic, genomic, and epigenomic data
Source: Aging (Albany NY). 2025 Aug 25;17(8):2126–51. doi: 10.18632/aging.206306 (PMC12422793; doi:10.18632/aging.206306)
Supplement: Supplementary Table 6 [file aging-17-8-206306-s003.xlsx]

## Sheet: Table S6
Supplementary Table 6. Results of multivariable linear regressions of PhenoAge acceleration (PhenoAgeAccel), BioAge acceleration (BioAgeAccel), and leukocyte telomere length on sleep duration.
Exposures	PhenoAgeAccel (N = 384,490)		BioAgeAccel (N = 317,723)		Telomere length (N = 442,664)
	Beta	P-value	Beta	P-value	Beta	P-value
Men and women combined
Continuous sleep duration	0.0788324984748197	1.81009399480697E-33	0.024461441577164	1.52752035447899E-06	0.000250469333901389	0.853374472117733
<5 h/d	0.436567156357079	1.04863991350543E-14	0.997250985536791	2.24957744796003E-47	-'0.0450814152694121	0.00228019314863765
5 h/d	0.268991552872517	8.54064527404909E-22	0.399272279780161	4.67235848332283E-29	-'0.0301913127653105	0.0000688479928018792
6 h/d	0.0870371918910152	5.66525324124883E-09	0.120259121517281	3.90185603503427E-10	-'0.0111634521659997	0.00653831623604616
7 h/d	Reference
8 h/d	0.108658613006857	8.094540275156E-17	0.199651328345294	1.3850869353216E-32	-'0.00875258473458661	0.0145081310590495
9 h/d	0.25585180675828	1.51711431400317E-26	0.572579344466541	6.8779220353241E-78	-'0.0178499962664148	0.00621543909342187
>9 h/d	0.550058124388675	2.73297669545773E-36	1.36265076596353	8.25244147347746E-139	-'0.0369808530537308	0.0013009290335637
Men-specific
Continuous sleep duration	0.042945167052666	0.0000108702491198219	0.0458337981411724	1.08631139291673E-07	0.00295429869778385	0.146545135637949
<5 h/d	0.595025439341527	4.41939894258179E-10	1.32785752789109	3.13926841830282E-39	-'0.0542455615270469	0.0149039852588602
5 h/d	0.34921423676344	1.59909076053909E-13	0.649829518090931	9.24702962289297E-35	-'0.0355275416392632	0.0018044451971968
6 h/d	0.106566332282128	0.0000099569055213168	0.204294802751916	6.10796961271377E-14	-'0.0206106130319224	0.000516562876064426
7 h/d	Reference
8 h/d	0.159602428892178	3.12393395127627E-13	0.166649753717679	1.60084574089314E-11	-0.0077344615902625	0.146916114557733
9 h/d	0.376376898481906	3.6580239009729E-20	0.583822342042371	3.34867129580765E-37	-0.0186411435095647	0.0596463176847197
>9 h/d	0.888618633209275	2.28899126302896E-33	1.64607966573602	9.99185024264771E-94	-0.040972421203697	0.017473622769652
Women-specific
Continuous sleep duration	0.057318815310098	6.4338385159303E-11	0.0203907061725765	0.000650092752439119	0.000342310504022259	0.851280052792289
<5 h/d	0.313754520543223	2.00031135769018E-06	0.79108075707482	2.34980989378877E-17	-0.0399882604615247	0.0429572787203922
5 h/d	0.187139010452589	1.22558101567318E-08	0.268121602725097	2.32544827028537E-08	-0.0297293835599942	0.00350292150872956
6 h/d	0.046444494429261	0.0103688619225508	0.103068609563628	0.000124914157417055	-0.00517202787355315	0.363228366920208
7 h/d	Reference
8 h/d	0.0869022397943992	1.82039119619948E-08	0.144142514407761	2.27382291160065E-10	-0.00589913212558861	0.223302574887776
9 h/d	0.196079776423134	2.42635971239241E-12	0.440972030112511	5.64126421007884E-27	-0.0125150691175289	0.15012938028367
>9 h/d	0.321521331333267	3.01886304724457E-10	1.01352563021717	1.68132104346465E-43	-0.0291232031550575	0.0593971270006748
Age < 58 years
Continuous sleep duration	0.0215439675856283	0.026158611436205	-'0.0045079739316458	0.547256933046794	0.00235673855982427	0.250068740563311
<5 h/d	1.17178015579112	9.15968425772772E-33	0.523759974401747	5.81415989156444E-11	-0.0352801221199462	0.0970183216978235
5 h/d	0.460258170206573	2.21665137144699E-19	0.388444437548721	4.73359713936009E-22	-0.0373563824274375	0.000748106963576612
6 h/d	0.163253089790088	7.66975865642202E-10	0.127612031255009	7.00549746112123E-10	-0.0169736694362997	0.00336027650682847
7 h/d	Reference
8 h/d	0.135160714517415	1.88520000119207E-08	0.115149198480988	4.56225987574235E-10	-0.00742499954256826	0.153148908961897
9 h/d	0.467707700730052	3.03572433702369E-21	0.244737511305514	2.1452624695931E-10	-0.0104903562356507	0.326969886689335
>9 h/d	1.29889971129068	5.18463393846896E-52	0.455018605018959	2.91172616334198E-11	-0.0481424691310424	0.00911028905940938
Age >= 58 years
Continuous sleep duration	0.0749771768749068	2.75092571159179E-17	0.061179852730106	1.78880089718617E-18	0.00130010990724908	0.474786281714447
<5 h/d	0.897490177786255	1.10963399389964E-20	0.323384050992715	0.0000502110716915625	-0.0557568522419963	0.00681520644756164
5 h/d	0.403536978766124	3.69768592816578E-16	0.136416811841684	0.000485855376492131	-0.0260767049155317	0.0123541702866453
6 h/d	0.135608524683675	9.13363388660809E-07	0.0256867177676348	0.233901687218924	-0.00867900857901908	0.136712818056345
7 h/d	Reference
8 h/d	0.172809242198397	1.36020378228384E-13	0.122030548895856	3.57697462772487E-11	-0.00506625757098303	0.306793904386453
9 h/d	0.515778136968254	1.26003526080056E-39	0.289661820483174	7.00211269390246E-21	-0.0158414959023345	0.0553116308523519
>9 h/d	1.28474463598528	1.07639817383821E-74	0.628419106346505	3.81874111726301E-28	-0.0225254899865976	0.126391871162798
