# Supplementary material for: Evaluating the nonlinear effects of sleep duration on biological aging across phenotypic, genomic, and epigenomic data
Source: Aging (Albany NY). 2025 Aug 25;17(8):2126–51. doi: 10.18632/aging.206306 (PMC12422793; doi:10.18632/aging.206306)
Supplement: Supplementary Table 7 [file aging-17-8-206306-s004.xlsx]

## Sheet: Table S7
Supplementary Table 7. Mendelian randomization estimates for PhenoAge acceleration (PhenoAgeAccel), BioAge acceleration (BioAgeAccel), and leukocyte telomere length in overall population and strata of population defined by residual sleep duration among UK biobank men participants.
Outcomes and Exposures	Estimate	LCL	UCL	P for Cochran’s Q	P for non-linearity
PhenoAgeAccel (N = 147,186)
Overall population	-0.303813743219545	-0.602931688147248	-0.00469579829184241
Mean duration in each stratum
5.7 h/d	-0.921188196004157	-1.71822870893874	-0.124147683069575	0.0989789188522113	0.00744724007168824
6.7 h/d	-0.66147122424612	-1.24759819673932	-0.0753442517529214
7.1 h/d	-0.292049414394767	-1.59482533531917	1.01072650652964
7.7 h/d	-0.163922495431137	-0.669688857948597	0.341843867086323
8.5 h/d	0.539529765968108	-0.307784802542627	1.38684433447884
BioAgeAccel (N = 121,160)
Overall population	-0.517263757539086	-0.779249097729848	-0.255278417348324
Mean duration in each stratum
5.7 h/d	-1.44056016134493	-2.09038970091895	-0.790730621770918	0.0157296438226073	0.00238803591720656
6.7 h/d	-0.490023254281238	-1.02556779119932	0.0455212826368422
7.1 h/d	-0.701164099872034	-2.03903506822767	0.636706868483598
7.7 h/d	-0.0857928330115419	-0.503748839181549	0.332163173158465
8.4 h/d	-0.272019895996088	-0.986492511711552	0.442452719719377
Telomere length (N = 168,944)		0	0
Overall population	0.046016825564646	-0.0121400174318017	0.104173668561094
Mean duration in each stratum
5.7 h/d	0.0115573954904499	-0.134228282916174	0.157343073897074	0.878331772852388	0.987091211485601
6.7 h/d	0.0769744515165059	-0.0433179489826025	0.197266852015614
7.1 h/d	0.0507004000553348	-0.206187036548538	0.307587836659208
7.7 h/d	0.0743053053100803	-0.0262227586998888	0.174833369320049
8.5 h/d	-0.00514758051007741	-0.155952428747837	0.145657267727682
