# Supplementary material for: Evaluating the nonlinear effects of sleep duration on biological aging across phenotypic, genomic, and epigenomic data
Source: Aging (Albany NY). 2025 Aug 25;17(8):2126–51. doi: 10.18632/aging.206306 (PMC12422793; doi:10.18632/aging.206306)
Supplement: Supplementary Table 8 [file aging-17-8-206306-s005.xlsx]

## Sheet: Table S8
Supplementary Table 8. Mendelian randomization estimates for PhenoAge acceleration (PhenoAgeAccel), BioAge acceleration (BioAgeAccel), and leukocyte telomere length in overall population and strata of population defined by residual sleep duration among UK biobank women participants.
Outcomes and Exposures	Estimate	LCL	UCL	P for Cochran’s Q	P for non-linearity
PhenoAgeAccel (N = 169,111)
Overall population	-0.370382555855532	-0.617242709678902	-0.123522402032162
Mean duration in each stratum
5.7 h/d	-0.900786497903724	-1.5052304282334	-0.296342567574045	0.0564153842371109	0.00599922599551614
6.7 h/d	-0.812046421626676	-1.3406116702347	-0.283481173018656
7.1 h/d	-0.109865017376906	-0.860266091461577	0.640536056707766
7.8 h/d	-0.0809845385299926	-0.62090026721235	0.458931190152364
8.5 h/d	0.111774995453031	-0.548394363526704	0.771944354432766
BioAgeAccel (N = 141,179)
Overall population	-0.0583696355148402	-0.55703128711484	0.44029201608516
Mean duration in each stratum
5.7 h/d	-0.711664078611884	-1.1213432559956	-0.301984901228167	0.210412233814949	0.0449077311225479
6.8 h/d	-0.223593220102543	-0.5652086601544	0.118022219949314
7.1 h/d	-0.0798545242075403	-0.599337263474359	0.439628215059278
7.8 h/d	-0.178497564388027	-0.532271292154892	0.175276163378838
8.5 h/d	-0.0941929359000119	-0.560783972726866	0.372398100926842
Telomere length (N = 197,755)		0	0
Overall population	0.0903384152170447	0.0399298768680685	0.140746953566021
Mean duration in each stratum
5.7 h/d	0.108097344456653	-0.0132292456816213	0.229423934594927	0.911264550227939	0.985425172801832
6.8 h/d	0.102370076524295	-0.00809212113148852	0.212832274180078
7.1 h/d	0.0466864090821038	-0.112836230942505	0.206209049106713
7.8 h/d	0.0667849674487692	-0.0437192291855141	0.177289164083053
8.5 h/d	0.136717792058693	-0.00547077818406877	0.278906362301454
