# Supplementary material for: Evaluating the nonlinear effects of sleep duration on biological aging across phenotypic, genomic, and epigenomic data
Source: Aging (Albany NY). 2025 Aug 25;17(8):2126–51. doi: 10.18632/aging.206306 (PMC12422793; doi:10.18632/aging.206306)
Supplement: Supplementary Table 9 [file aging-17-8-206306-s006.xlsx]

## Sheet: Table S9
Supplementary Table 9. Mendelian randomization estimates for PhenoAge acceleration (PhenoAgeAccel), BioAge acceleration (BioAgeAccel), and leukocyte telomere length in overall population and strata of population defined by residual sleep duration among younger (age < 58 years) UK biobank participants.
Outcomes and Exposures	Estimate	LCL	UCL	P for Cochran’s Q	P for non-linearity
PhenoAgeAccel (N = 183,370)
Overall population	-0.109126711360393	-0.391565041672109	0.173311618951323
Mean duration in each stratum
6.0 h/d	-0.859921795352671	-1.47615352467161	-0.243690066033727	0.02326886491491	0.00593409822581799
6.7 h/d	-0.806136769247807	-1.4499481463497	-0.162325392145911
7.1 h/d	0.0222566260068334	-0.665727168128104	0.71024042014177
7.5 h/d	-0.565697107791001	-1.23052961776108	0.0991354021790831
8.2 h/d	0.423489072829021	-0.23692557800127	1.08390372365931
BioAgeAccel (N = 154,114)
Overall population	-0.0927649621397954	-0.318772533579026	0.133242609299436
Mean duration in each stratum
6.0 h/d	-0.961032110383459	-1.455807638782	-0.466256581984917	0.0169665005176707	0.326778775687761
6.7 h/d	0.121577747699603	-0.41117491613784	0.654330411537047
7.1 h/d	0.0147148713833128	-0.510437671226789	0.539867413993415
7.5 h/d	-0.0852804018661623	-0.631070491692198	0.460509687959873
8.2 h/d	-0.531736151039439	-1.02953365834277	-0.0339386437361132
Telomere length (N = 175,794)		0	0
Overall population	0.0621290328373226	0.00171224516157667	0.122545820513069
Mean duration in each stratum
6.0 h/d	0.15091635961349	0.0285060132032314	0.273326706023749	0.53905632298523	0.369824844908049
6.7 h/d	0.0033127143180246	-0.128869268780564	0.135494697416613
7.1 h/d	0.097976986500686	-0.0439610934451652	0.239915066446537
7.5 h/d	0.0339707527444703	-0.0995327864286097	0.16747429191755
8.2 h/d	0.0582641519888116	-0.0766893612002861	0.193217665177909
