# Supplementary material for: Evaluating the nonlinear effects of sleep duration on biological aging across phenotypic, genomic, and epigenomic data
Source: Aging (Albany NY). 2025 Aug 25;17(8):2126–51. doi: 10.18632/aging.206306 (PMC12422793; doi:10.18632/aging.206306)
Supplement: Supplementary Table 10 [file aging-17-8-206306-s007.xlsx]

## Sheet: Table S10
Supplementary Table 10. Mendelian randomization estimates for PhenoAge acceleration (PhenoAgeAccel), BioAge acceleration (BioAgeAccel), and leukocyte telomere length in overall population and strata of population defined by residual sleep duration among older (age >= 58 years) UK Biobank participants.
Outcomes and Exposures	Estimate	LCL	UCL	P for Cochran’s Q	P for non-linearity
PhenoAgeAccel (N = 201,120)
Overall population	-0.106932241852705	-0.347063495114589	0.13319901140918
Mean duration in each stratum
6.0 h/d	-0.652756331188248	-1.24764400439368	-0.057868657982815	0.206580452747267	0.0383525554261643
6.7 h/d	-0.47291586531841	-1.01578351933132	0.0699517886944999
7.2 h/d	-0.610836823977533	-1.15347788052863	-0.0681957674264307
7.7 h/d	0.0371212327682161	-0.544445676848745	0.618688142385177
8.4 h/d	0.0800320465504358	-0.496154789784707	0.656218882885579
BioAgeAccel (N = 163,609)
Overall population	-0.301472160935713	-0.493371253547917	-0.109573068323509
Mean duration in each stratum
6.0 h/d	-0.715810795082191	-1.14768597857274	-0.283935611591644	0.0116014246621228	0.0493089339775503
6.7 h/d	-0.243288356928083	-0.68703668083082	0.200459966974655
7.2 h/d	-0.373732575097237	-0.812397956977836	0.0649328067833614
7.7 h/d	-0.830603434603835	-1.28107773489469	-0.380129134312976
8.4 h/d	0.195703747168646	-0.249455243926882	0.640862738264175
Telomere length (N = 190,905)		0	0
Overall population	0.0705648936950462	0.0214623244567299	0.119667462933363
Mean duration in each stratum
6.0 h/d	0.091337352099185	-0.0191268183885522	0.201801522586922	0.372511353952032	0.579379416645928
6.7 h/d	0.124971079940075	0.016865250551592	0.233076909328559
7.2 h/d	-0.00950456298394983	-0.116279957023341	0.0972708310554412
7.7 h/d	0.124570798204501	0.00894610210174111	0.24019549430726
8.4 h/d	0.048014158682841	-0.059946327296784	0.155974644662466
