# Supplementary material for: Evaluating the nonlinear effects of sleep duration on biological aging across phenotypic, genomic, and epigenomic data
Source: Aging (Albany NY). 2025 Aug 25;17(8):2126–51. doi: 10.18632/aging.206306 (PMC12422793; doi:10.18632/aging.206306)
Supplement: Supplementary Table 11 [file aging-17-8-206306-s008.xlsx]

## Sheet: Table S11
Supplementary Table 11. Mendelian randomization estimates for PhenoAge acceleration (PhenoAgeAccel), BioAge acceleration (BioAgeAccel), and leukocyte telomere length in overall population and strata of population defined by residual sleep duration after adjusting for additional confounders.
Outcomes and Exposures	Estimate	LCL	UCL	P for Cochran’s Q	P for non-linearity
PhenoAgeAccel (N = 316,297)
Overall population	-0.0996415724363855	-0.280745813464279	0.0814626685915085
Mean duration in each stratum
5.7 h/d	-0.566484209935918	-1.03945133433461	-0.0935170855372224	0.0330776113616603	0.00179887638349556
6.8 h/d	-0.430723584096977	-0.806489523389979	-0.0549576448039756
7.1 h/d	-0.157237274972096	-0.791925513435406	0.477450963491214
7.8 h/d	0.116603290972519	-0.230375804819293	0.463582386764332
8.5 h/d	0.309775817149449	-0.202901271826165	0.822452906125063
BioAgeAccel (N = 262,339)
Overall population	-0.230218462968892	-0.36980806646976	-0.0906288594680245
Mean duration in each stratum
5.8 h/d	-0.510560746792445	-0.861051488065393	-0.160070005519498	0.224274968784514	0.0503668295467122
6.8 h/d	-0.334902671176055	-0.635739379546454	-0.0340659628056553
7.1 h/d	-0.140634961772312	-0.646017495078666	0.364747571534041
7.7 h/d	-0.00549150916684258	-0.279756319771362	0.268773301437676
8.5 h/d	-0.181251179387028	-0.563481487445684	0.200979128671628
Telomere length (N = 366,669)		0	0
Overall population	0.0658127984232352	0.0278121220412483	0.103813474805222
Mean duration in each stratum
5.7 h/d	0.0746434646132192	-0.0247108996221049	0.173997828848543	0.984623143335813	0.831263159106169
6.8 h/d	0.0505478561140637	-0.0340169251628465	0.135112637390974
7.1 h/d	0.0573122658106633	-0.0815034961923975	0.196128027813724
7.8 h/d	0.0839608552538374	0.00678356292537226	0.161138147582303
8.5 h/d	0.0734090902121871	-0.0316087176804345	0.178426898104809
