# Supplementary material for: Evaluating the nonlinear effects of sleep duration on biological aging across phenotypic, genomic, and epigenomic data
Source: Aging (Albany NY). 2025 Aug 25;17(8):2126–51. doi: 10.18632/aging.206306 (PMC12422793; doi:10.18632/aging.206306)
Supplement: Supplementary Table 12 [file aging-17-8-206306-s009.xlsx]

## Sheet: Table S12
Supplementary Table 12. Mendelian randomization estimates for PhenoAge acceleration (PhenoAgeAccel), BioAge acceleration (BioAgeAccel), and leukocyte telomere length in overall population and strata of population defined by residual sleep duration after excluding potential pleiotropic variants from the genetic risk score .
Outcomes and Exposures	Estimate	LCL	UCL	P for Cochran’s Q	P for non-linearity
PhenoAgeAccel (N = 316,297)
Overall population	0.0907999390303	-0.0944253676160724	0.276025245676672
Mean duration in each stratum
5.7 h/d	-0.849903099631192	-1.34248182926965	-0.35732436999273	0.00322014816195093	0.000116195825387759
6.8 h/d	-0.272712026361721	-0.688869590212296	0.143445537488854
7.1 h/d	-0.468365470865463	-1.12641651918012	0.189685577449192
7.8 h/d	0.0412438104010931	-0.343260151760206	0.425747772562392
8.5 h/d	0.54537444781009	-0.0100755252528314	1.10082442087301
BioAgeAccel (N = 262,339)
Overall population	-0.210648069604466	-0.353240570331931	-0.068055568877001
Mean duration in each stratum
5.8 h/d	-0.820754014703024	-1.18288231535152	-0.458625714054531	0.063285123258475	0.00506109430255164
6.8 h/d	-0.461700387795032	-0.799616112167811	-0.123784663422252
7.1 h/d	-0.233117928928766	-0.794225968177102	0.32799011031957
7.8 h/d	-0.178302400250899	-0.468153936916997	0.111549136415199
8.5 h/d	-0.179227963292396	-0.599750186768433	0.241294260183641
Telomere length (N = 366,669)
Overall population	0.0617872488439964	0.0231872241187573	0.100387273569235
Mean duration in each stratum
5.7 h/d	0.0992271639780259	0.00518715950158691	0.193267168454465	0.955670946241424	0.44364586383495
6.8 h/d	0.0714103301615749	-0.0140876676188778	0.156908327942028
7.1 h/d	0.0729752446272945	-0.0634056811448975	0.209356170399487
7.8 h/d	0.0518417773980199	-0.0257306942133844	0.129414249009424
8.5 h/d	0.0542559785778122	-0.0525186172019878	0.161030574357612
